# Supplementary material for: Detection and validation of single feature polymorphisms in cowpea (Vigna unguiculata L. Walp) using a soybean genome array
Source: PubMed Central journal article supplement (PMC2270837; doi:10.1186/1471-2164-9-107), 2008-02-28
Supplement: 1471-2164-9-107-S2.pdf [file 1471-2164-9-107-S2.pdf]

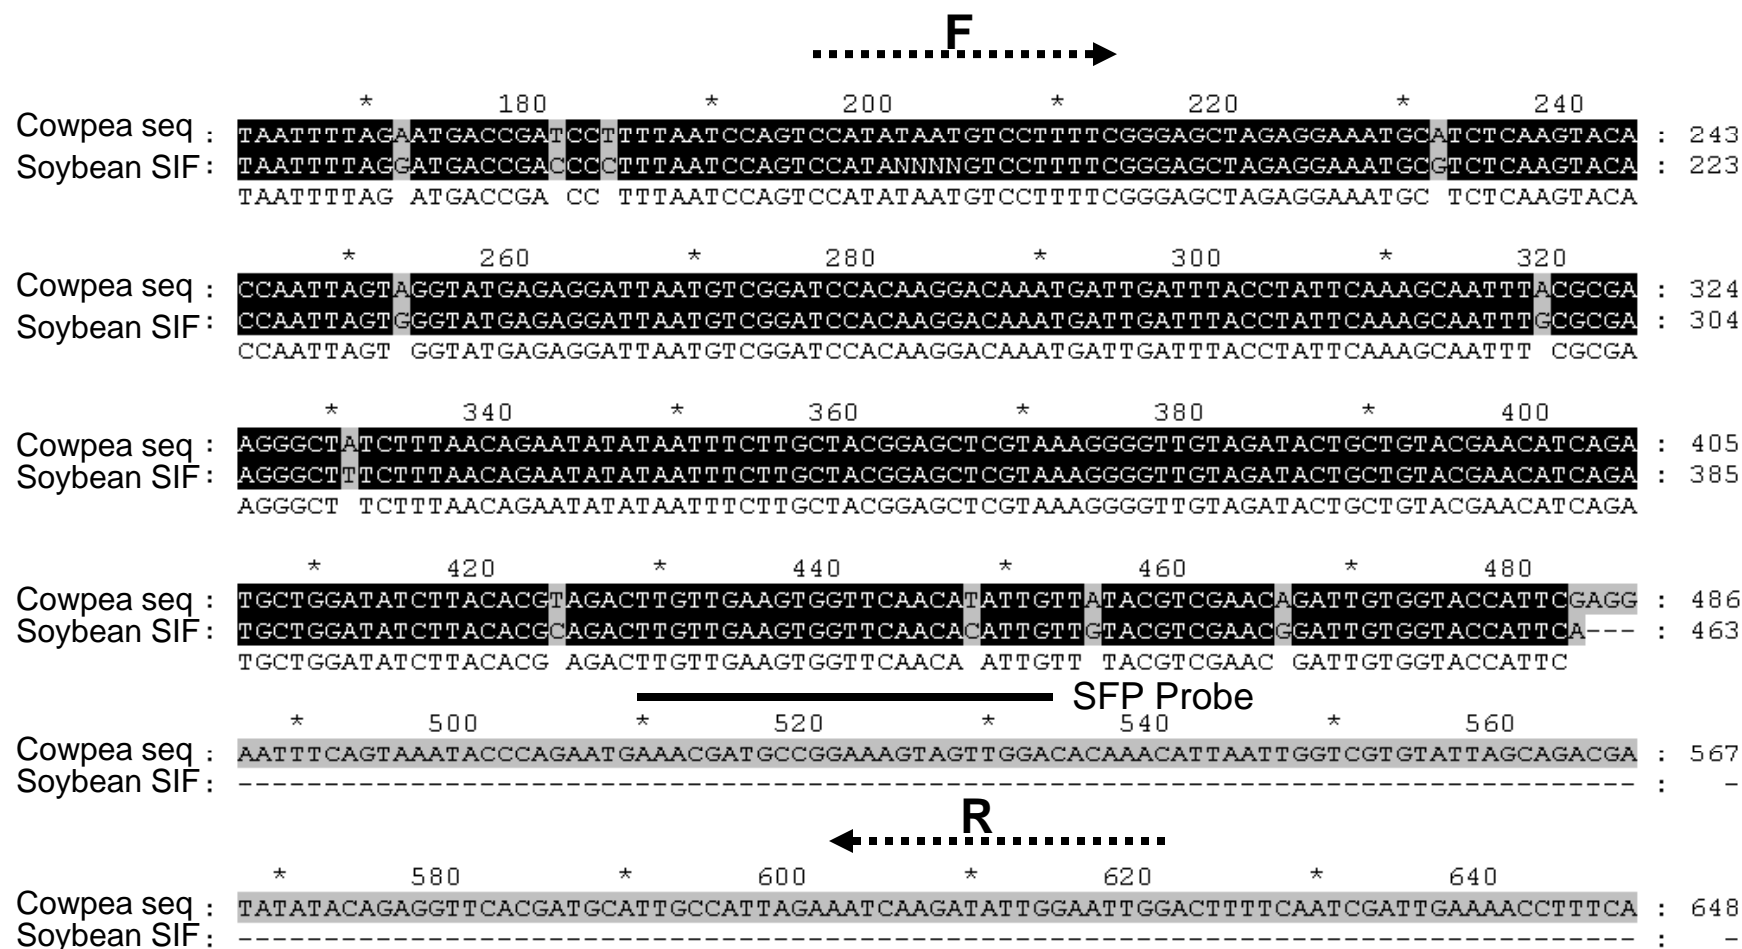

**Additional File 2.** Strategy for primer design. F is forward primer, R is reverse primer and solid line indicate SFP probe position.
